# Supplementary material for: Gastrointestinal Bleeding in Extracorporeal Membrane Oxygenation Patients: A Comprehensive Analysis of Risk Factors and Clinical Outcomes
Source: PubMed Central journal article supplement — J Chest Surg. 2024 Feb 8;57(2):195–204. doi: 10.5090/jcs.23.136 (PMC10927420; doi:10.5090/jcs.23.136), 2024-02-08
Supplement: jcs-57-2-195-supple.pdf [file jcs-57-2-195-supple.pdf]

**Supplementary Table 1.** Demographics of patients according to the mortality outcome

| Characteristic                        | Survival (n=182) | Mortality (n=302) | p-value |
|---------------------------------------|------------------|-------------------|---------|
| Age (yr)                              | 55.0 (47.0–63.0) | 60.0 (51.0–68.0)  | 0.002   |
| Male                                  | 126 (69.2)       | 218 (72.2)        | 0.555   |
| Hypertension                          | 85 (46.7)        | 114 (37.7)        | 0.065   |
| Diabetes                              | 53 (29.1)        | 77 (25.5)         | 0.444   |
| Coronary disease                      | 17 (9.3)         | 38 (12.6)         | 0.347   |
| Cerebrovascular accident              | 11 (6.0)         | 15 (5.0)          | 0.763   |
| Chronic kidney disease                | 8 (4.4)          | 13 (4.3)          | 1.000   |
| Chronic obstructive pulmonary disease | 4 (2.2)          | 6 (2.0)           | 1.000   |
| Asthma                                | 5 (2.7)          | 8 (2.6)           | 1.000   |
| Gastric ulcer                         | 0                | 6 (2.0)           | 0.135   |
| Liver cirrhosis                       | 2 (1.1)          | 8 (2.6)           | 0.406   |
| Autoimmune disease                    | 3 (1.6)          | 12 (4.0)          | 0.246   |
| ECPR                                  | 38 (20.9)        | 77 (25.6)         | 0.287   |
| SOFA score                            | 12.0 (9.0–14.0)  | 12.0 (10.0–14.0)  | 0.007   |
| SAPS score                            | 64.0 (45.0–80.0) | 70.0 (49.0–85.0)  | 0.026   |
| Initial ECMO mode                     |                  |                   | 0.960   |
| Venoarterial                          | 132 (72.5)       | 221 (73.2)        |         |
| Venovenous                            | 50 (27.5)        | 81 (26.8)         |         |
| ECMO mode change                      | 6 (3.3)          | 49 (16.2)         | <0.001  |
| ECMO duration (day)                   | 11.0 (8.0–16.0)  | 14.5 (5.0–28.0)   | 0.017   |
| ICU stay (day)                        | 26.0 (17.0–41.0) | 23.0 (8.0–41.0)   | 0.004   |
| Hospital stay (day)                   | 43.0 (30.0–65.0) | 24.0 (10.0–44.0)  | <0.001  |
| Complications                         |                  |                   |         |
| Gastrointestinal bleeding             | 4 (2.2)          | 40 (13.2)         | <0.001  |
| Other bleeding                        | 13 (7.3)         | 42 (14.1)         | 0.035   |
| Limb ischemia                         | 6 (3.3)          | 14 (4.6)          | 0.630   |
| Stroke                                |                  |                   |         |
| Ischemic                              | 3 (1.6)          | 37 (12.3)         | <0.001  |
| Hemorrhagic                           | 0                | 12 (4.0)          | 0.015   |
| ECMO weaning failure                  | 0                | 246 (81.5)        | <0.001  |

Values are presented as median (interquartile range) or number (%).

ECPR, extracorporeal cardiopulmonary resuscitation; SOFA, Sequential Organ Failure Assessment; SAPS, Simplified Acute Physiology Score; ECMO, extracorporeal membrane oxygenation; ICU, intensive care unit.

**Supplementary Table 2.** Demographics of patients according to the result of weaning from ECMO

| Variable                              | Weaning success<br>(n=238) | Weaning failure<br>(n=246) | p-value |
|---------------------------------------|----------------------------|----------------------------|---------|
| Age (yr)                              | 56.0 (47.0–66.0)           | 60.0 (51.0–67.0)           | 0.014   |
| Male                                  | 163 (68.5)                 | 181 (73.6)                 | 0.257   |
| Hypertension                          | 110 (46.2)                 | 89 (36.2)                  | 0.031   |
| Diabetes                              | 68 (28.6)                  | 62 (25.2)                  | 0.463   |
| Coronary disease                      | 24 (10.1)                  | 31 (12.6)                  | 0.466   |
| Cerebrovascular accident              | 14 (5.9)                   | 12 (4.9)                   | 0.773   |
| Chronic kidney disease                | 12 (5.0)                   | 9 (3.7)                    | 0.600   |
| Chronic obstructive pulmonary disease | 6 (2.5)                    | 4 (1.6)                    | 0.710   |
| Asthma                                | 7 (2.9)                    | 6 (2.4)                    | 0.952   |
| Gastric ulcer                         | 0                          | 6 (2.4)                    | 0.044   |
| Liver cirrhosis                       | 2 (0.8)                    | 8 (3.3)                    | 0.122   |
| Autoimmune disease                    | 3 (1.3)                    | 12 (4.9)                   | 0.042   |
| ECPR                                  | 51 (21.4)                  | 64 (26.1)                  | 0.270   |
| SOFA score                            | 12.0 (9.0–14.0)            | 12.0 (10.0–15.0)           | 0.006   |
| SAPS score                            | 64.5 (45.0–81.0)           | 71.0 (51.0–85.0)           | 0.019   |
| Initial ECMO mode                     |                            |                            | 0.298   |
| Venoarterial                          | 168 (70.6)                 | 185 (75.2)                 |         |
| Venovenous                            | 70 (29.4)                  | 61 (24.2)                  |         |
| ECMO mode change                      | 11 (4.6)                   | 44 (17.9)                  | <0.001  |
| ECMO duration (day)                   | 12.0 (8.0–17.0)            | 14.5 (4.0–30.0)            | 0.225   |
| ICU stay (day)                        | 29.0 (18.0–43.0)           | 19.0 (7.0–37.0)            | <0.001  |
| Hospital stay (day)                   | 42.0 (29.0–64.0)           | 22.0 (8.0–40.0)            | <0.001  |
| Complications                         |                            |                            |         |
| Gastrointestinal bleeding             | 6 (2.5)                    | 38 (15.4)                  | <0.001  |
| Other bleeding                        | 16 (6.8)                   | 39 (16.0)                  | 0.003   |
| Limb ischemia                         | 9 (3.8)                    | 11 (4.5)                   | 0.878   |
| Stroke                                |                            |                            |         |
| Ischemic                              | 6 (2.5)                    | 34 (13.8)                  | <0.001  |
| Hemorrhagic                           | 1 (0.4)                    | 11 (4.5)                   | 0.010   |
| Mortality                             | 56 (23.5)                  | 246 (100.0)                | <0.001  |

Values are presented as median (interquartile range) or number (%).

ECMO, extracorporeal membrane oxygenation; ECPR, extracorporeal cardiopulmonary resuscitation; SOFA, Sequential Organ Failure Assessment; SAPS, Simplified Acute Physiology Score; ICU, intensive care unit.

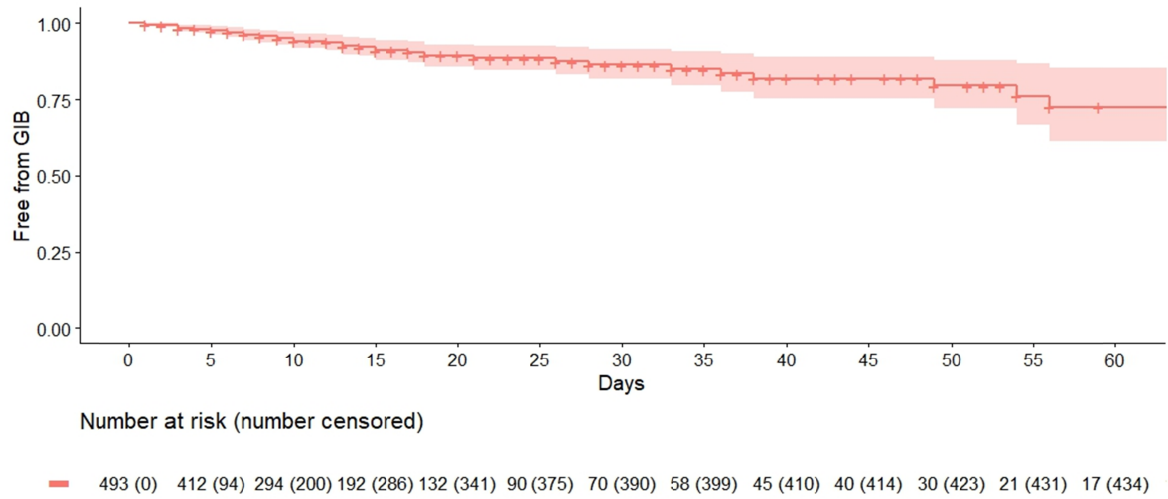

**Supplementary Fig. 1.** A Kaplan-Meier analysis of gastrointestinal bleeding (GIB) events throughout the extracorporeal membrane oxygenation period.
